# Supplementary material for: 3D reconstruction identifies loci linked to variation in angle of individual sorghum leaves
Source: PeerJ journal article supplement (doi:10.7717/peerj.12628), 2021-12-22

(A)

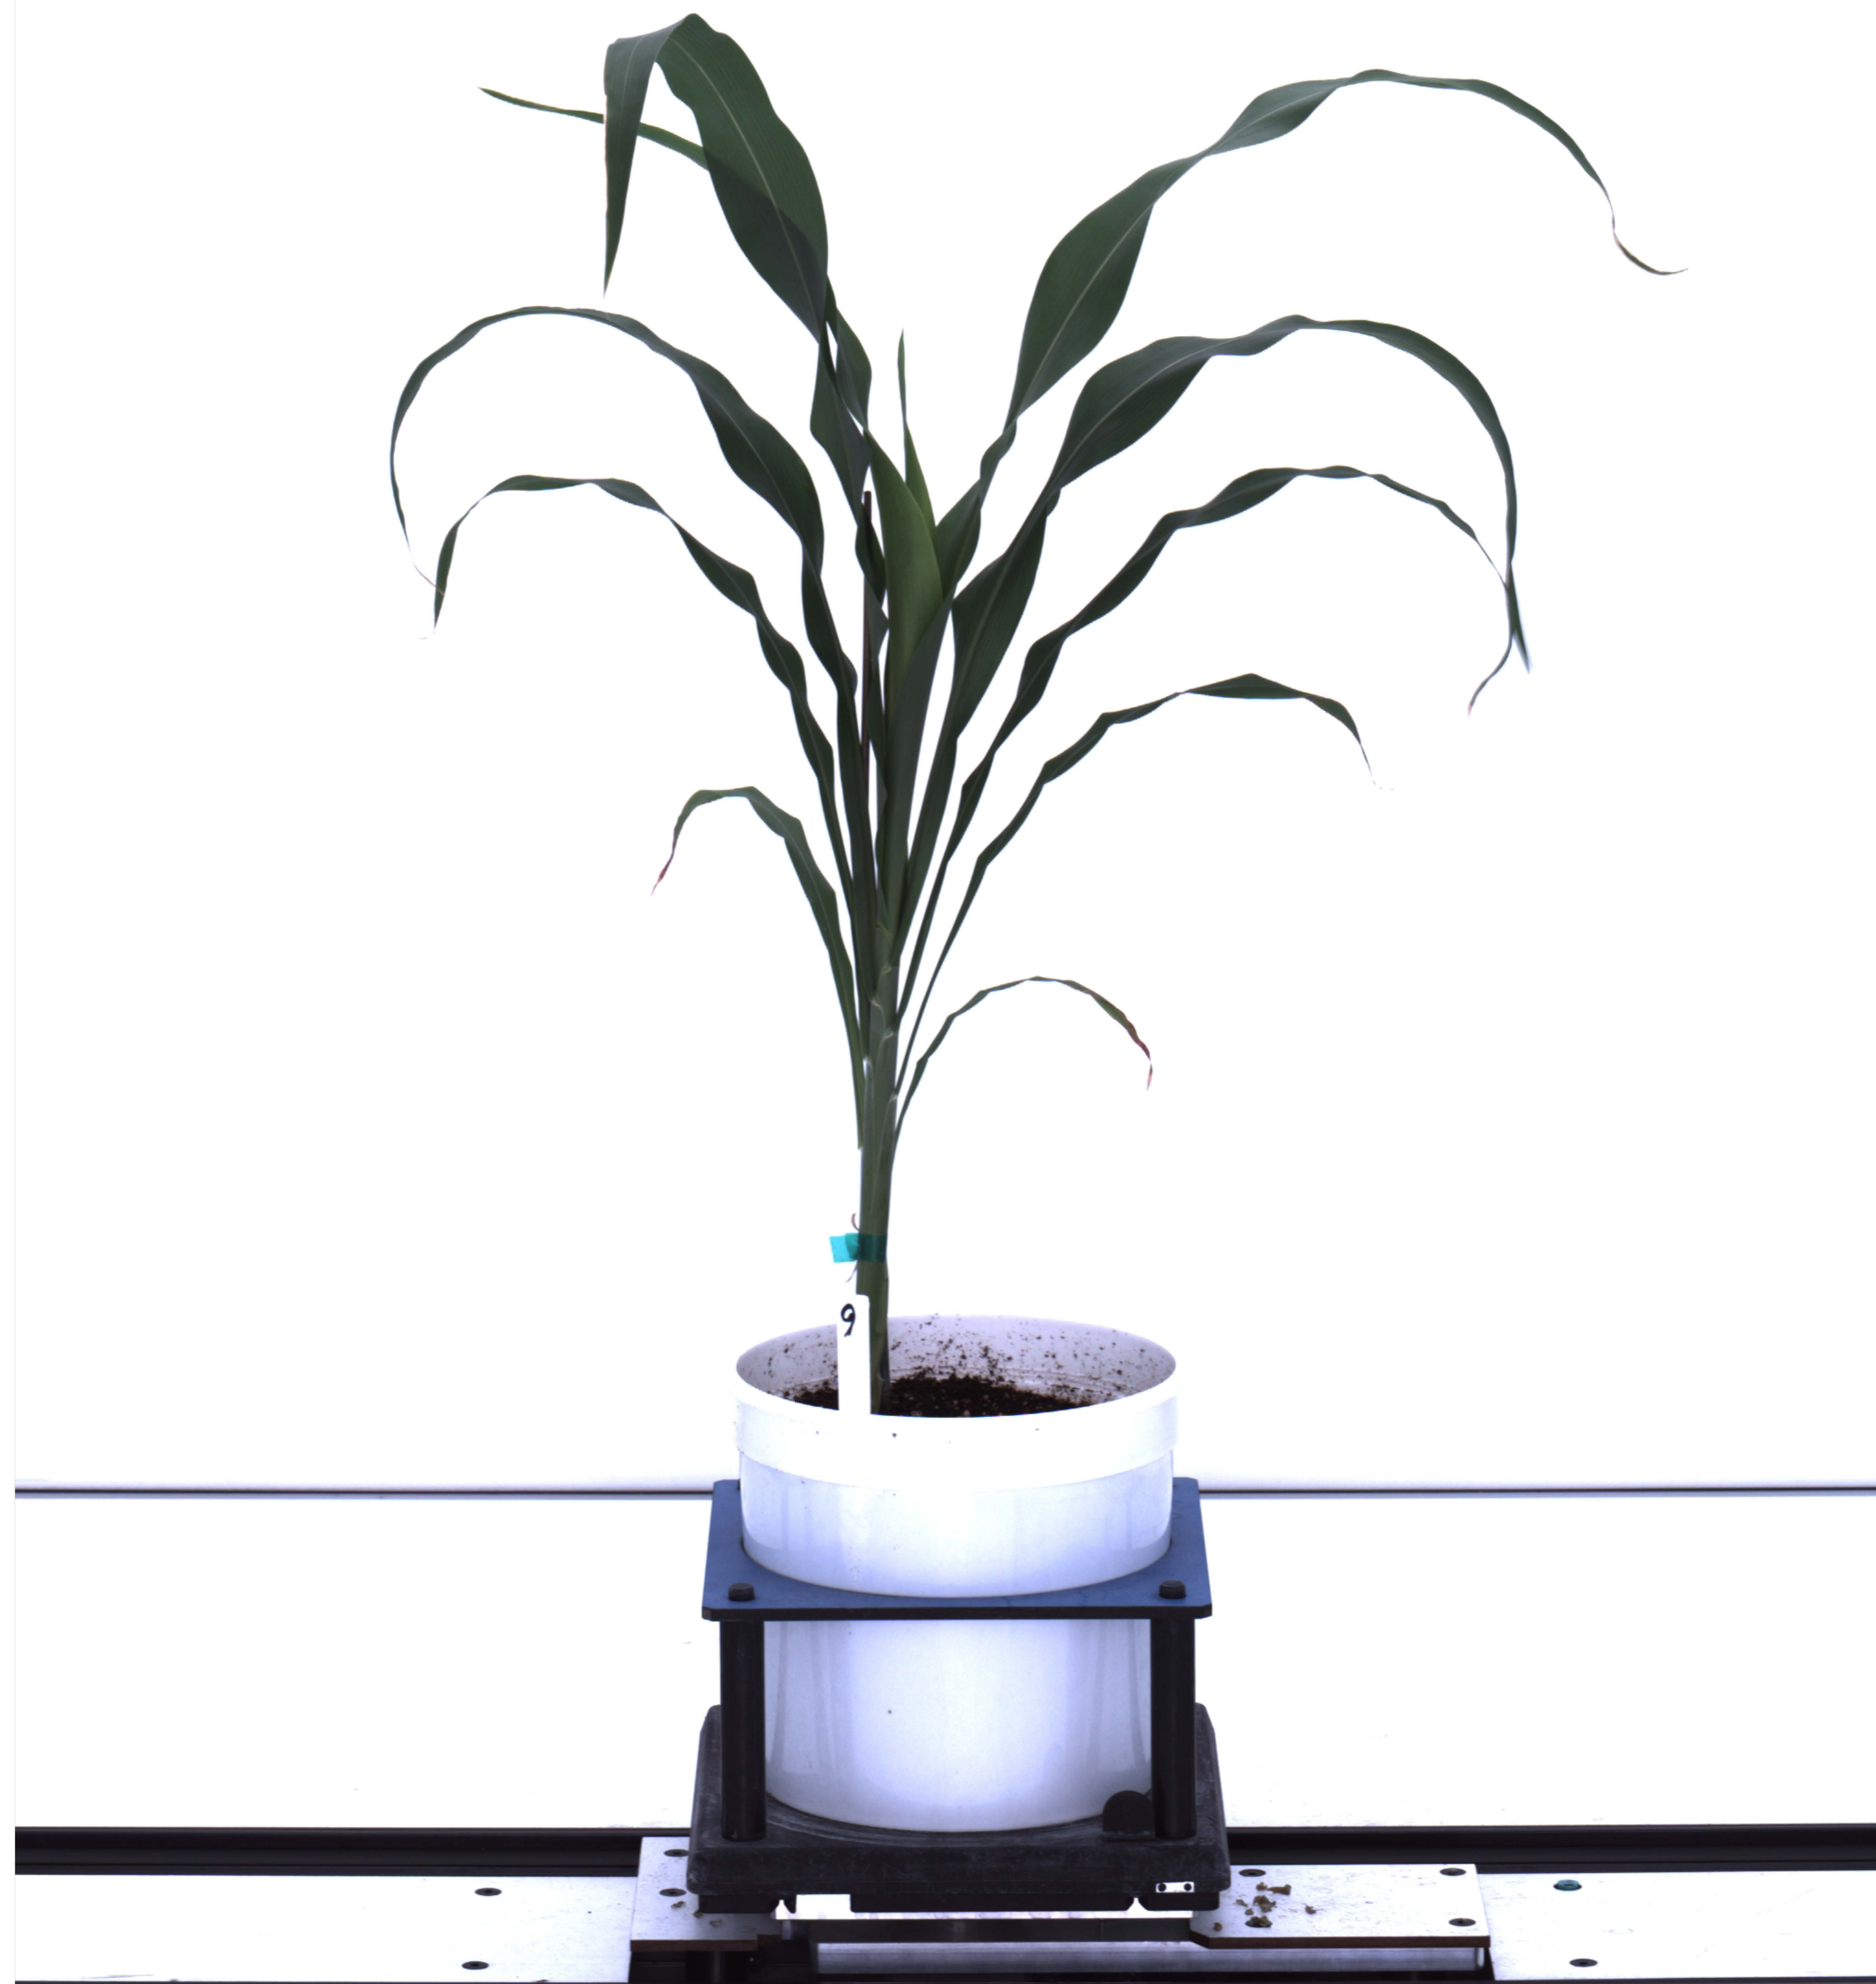

(B)

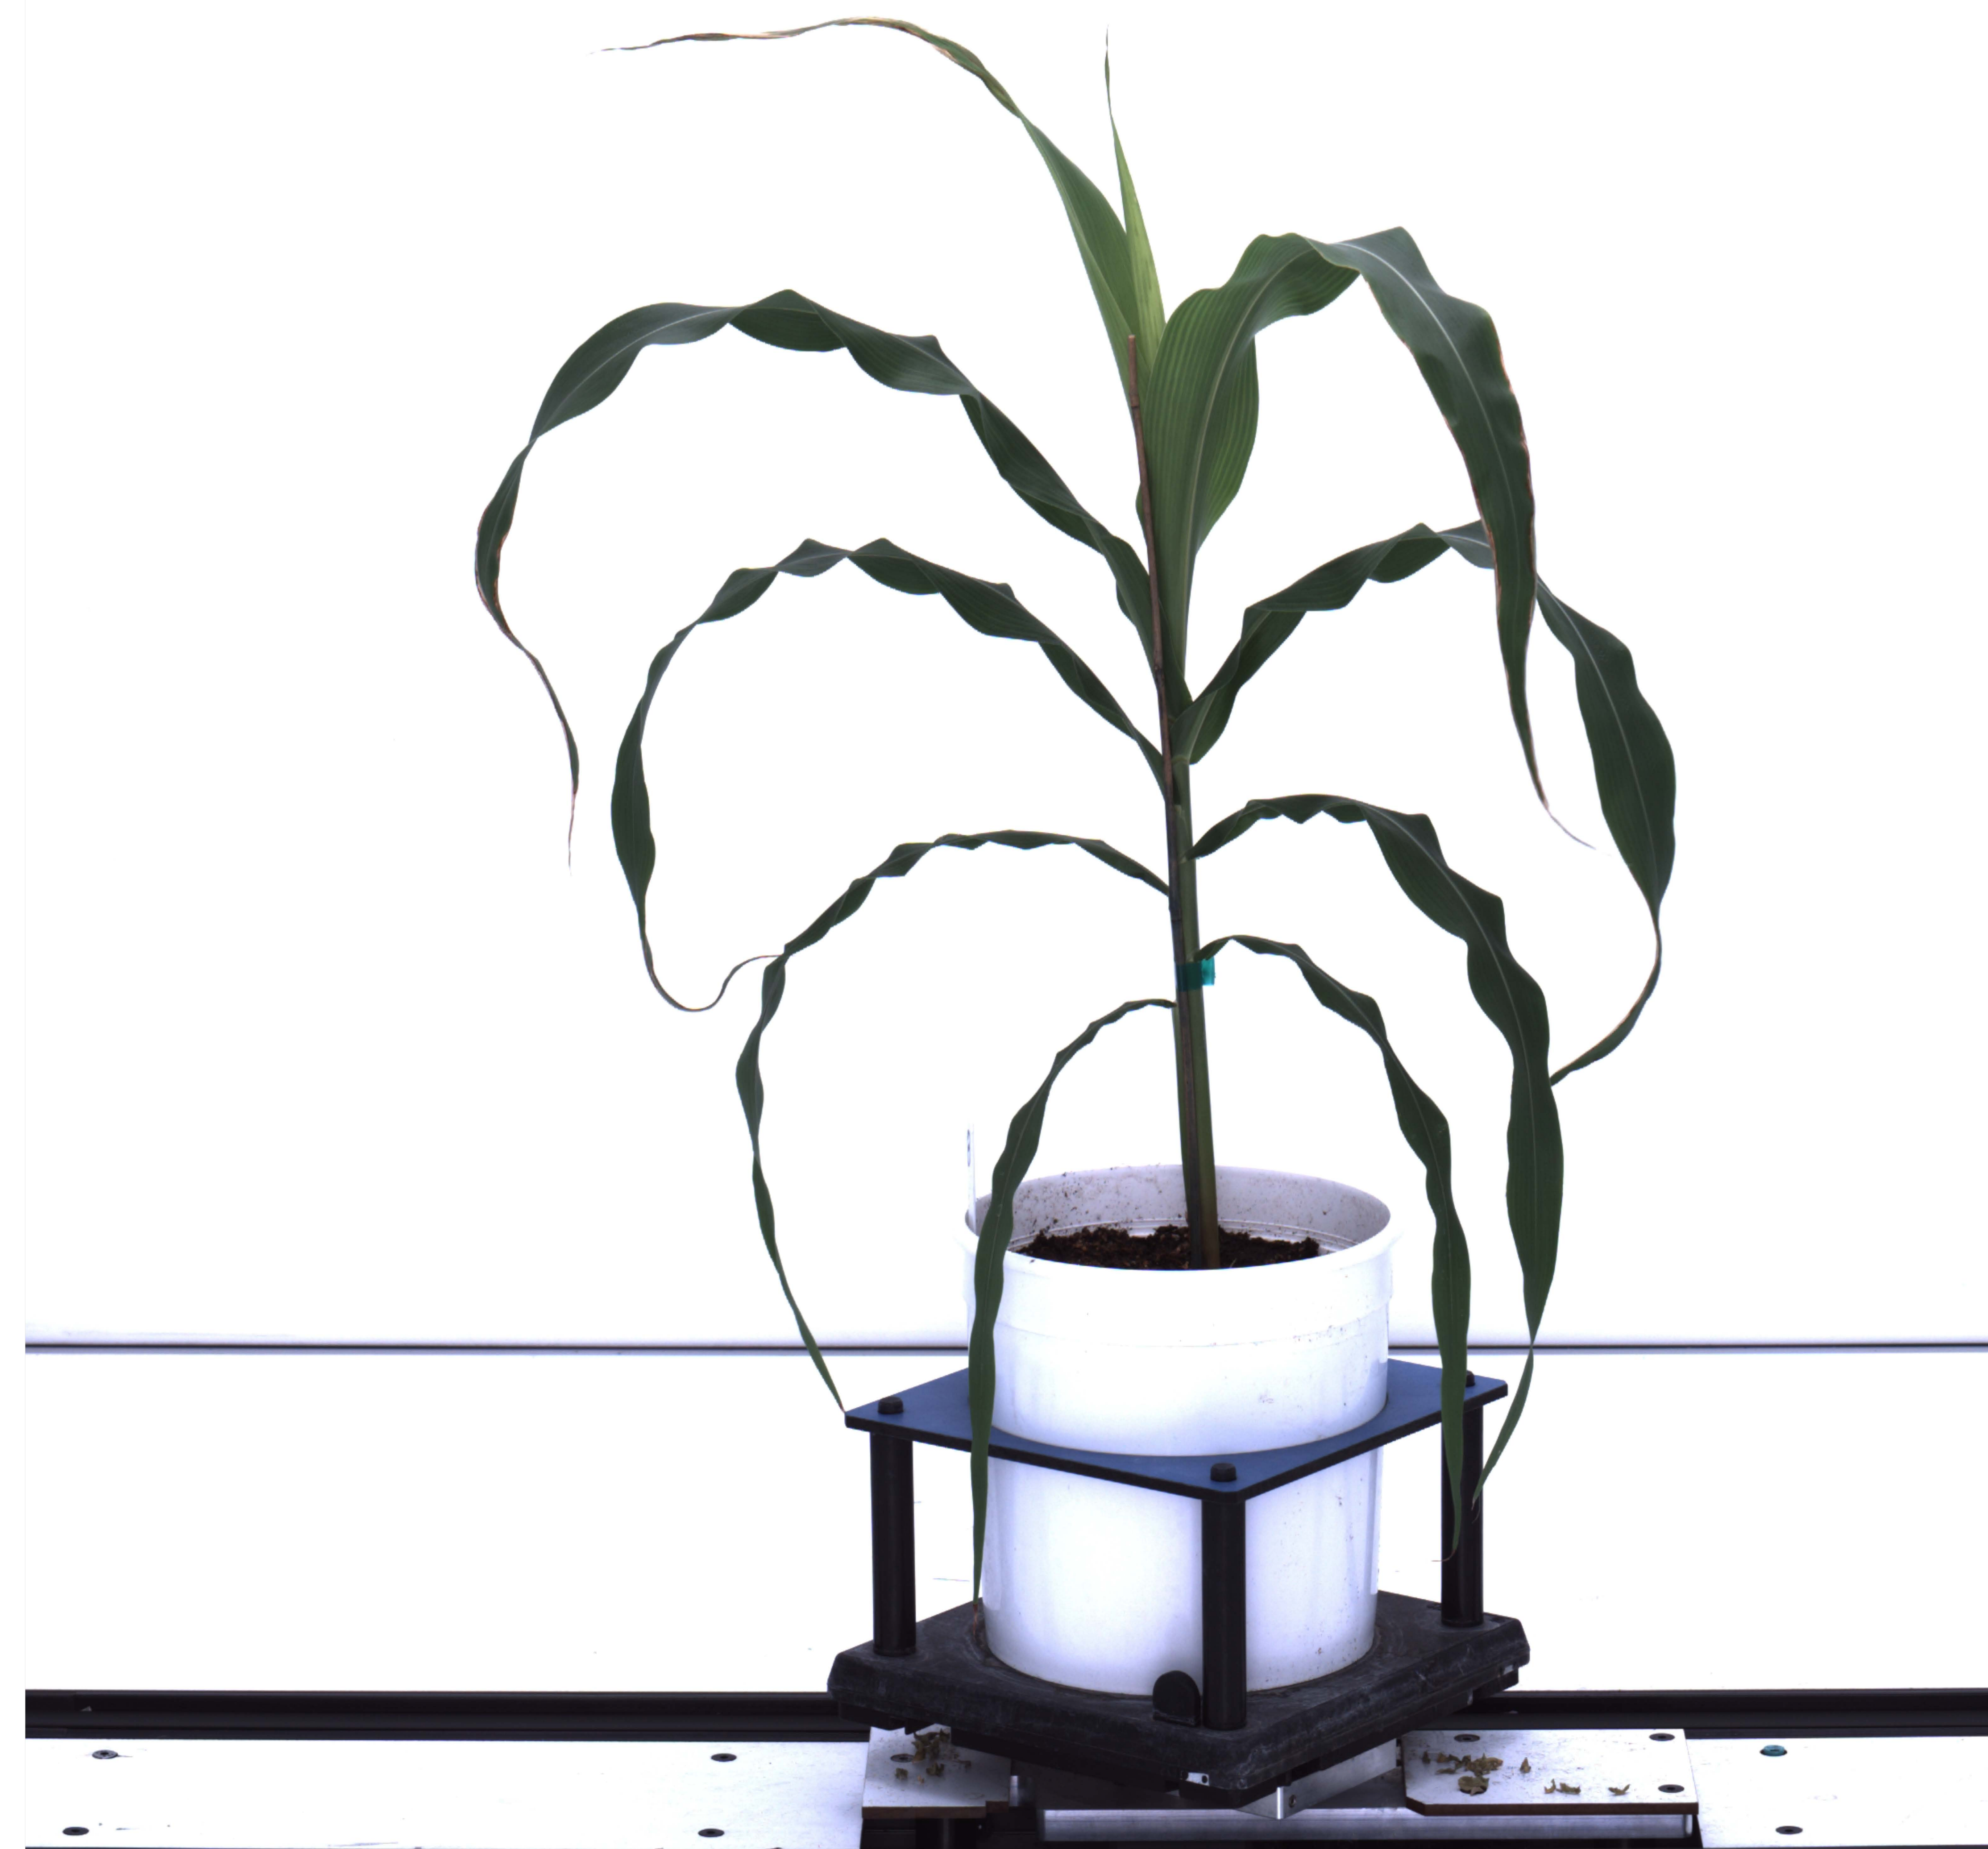

Supplement: Fig_S1.pdf [file Fig_S1.pdf]
